# Supplementary material for: Changes in Loneliness, BDNF, and Biological Aging Predict Trajectories in a Blood-Based Epigenetic Measure of Cortical Aging: A Study of Older Black Americans
Source: MDPI journal article supplement (doi:10.3390/genes14040842), 2023-03-31
Supplement: s1 [file s1]

Online Supplement Table S1

Partial Correlations between Cortical Age-Bd and MoCA subscales controlling for epigenetic clocks

|                   | Zero<br>correlation | Controlling<br>Pace | Controlling<br>GrimAge | Controlling<br>PhenoAge |
|-------------------|---------------------|---------------------|------------------------|-------------------------|
| Visual Spatial    | -.258**             | -.260**             | -.259**                | -.203**                 |
| Attention Tap     | -.203**             | -.196**             | -.132 <sup>†</sup>     | -.183*                  |
| Language fluency  | -.227**             | -.222**             | -.153*                 | -.195**                 |
| Abstraction total | -.197**             | -.175*              | -.088                  | -.067                   |
| Delayed Recall    | -.126 <sup>†</sup>  | -.119               | -.017                  | -.169*                  |
| Orientation Total | -.216**             | -.226**             | -.115                  | -.168*                  |
| MoCA              | -.278**             | -.270**             | -.152*                 | -.216**                 |

<sup>†</sup>  $p < 0.1$ , \*  $p < 0.05$ , \*\*  $p < 0.01$  (two-tailed tests).

Supplemental Table S2

The list of the CpG sites in BDNFm

| CpG index for 1stExon | CpG index for Promoter 1 |
|-----------------------|--------------------------|
| cg09505801            | cg07704699               |
| cg21291635            | cg10635145               |
| cg06025631            | cg12448003               |
| cg07159484            | cg04106006               |
| cg22043168            | cg06684850               |
| cg27193031            | cg01225698               |
| cg26949694            | cg11718030               |
| cg25412831            | cg15462887               |
| cg06816235            | cg10022526               |
| cg24650785            | cg25156688               |
| cg11241206            | cg06046431               |
| cg04672351            | cg01583131               |
| cg20340655            | cg24249411               |
| cg09606766            |                          |
| cg27351358            |                          |
| cg02527472            |                          |
| cg01642653            |                          |
| cg16257091            |                          |
